# Supplementary material for: Proposing evidence-based strategies to strengthen implementation of healthcare reform in resource-limited settings: a summative analysis
Source: PubMed Central journal article supplement — BMJ Open. 2016 Sep 20;6(9):e012582. doi: 10.1136/bmjopen-2016-012582 (PMC5051438; doi:10.1136/bmjopen-2016-012582), 2016-09-20
Supplement: bmjopen-2016-012582supp_appendix.pdf [file bmjopen-2016-012582supp_appendix.pdf]

## **BPR critical success factors**

### **Adequate financial resources**

- Increase in hospital's income
- The required financial resources
- Efficient and effective financing system

---

### **Top management commitment and support**

- To maintain the BPR reform
- To support the BPR reform
- To engage technical staff in decision making

---

### **Training needs**

- Adequacy of staff knowledge on BPR
- Technical competency of staff to implement the BPR
- Adequacy of training staff received

---

### **Collaborative working environment**

- A good working relationship among staffs
- Enough and competent technical and administration staff
- Opportunities to learn from successes and challenges

---

### **Flatter structure**

- Staff involved in developing plans for improving quality
- The right team members were structured to process the reform
- Clear channel of communication in place

---

### **Information technology**

- Functioning computers in place for IT
- Enough internet access
- Easy and time-efficient reporting systems

---

Adapted from<sup>12 16 20 21 22 38</sup>
